# Supplementary material
Source: PubMed Central journal article supplement (PMC6957254)

Suppl. Fig. 1

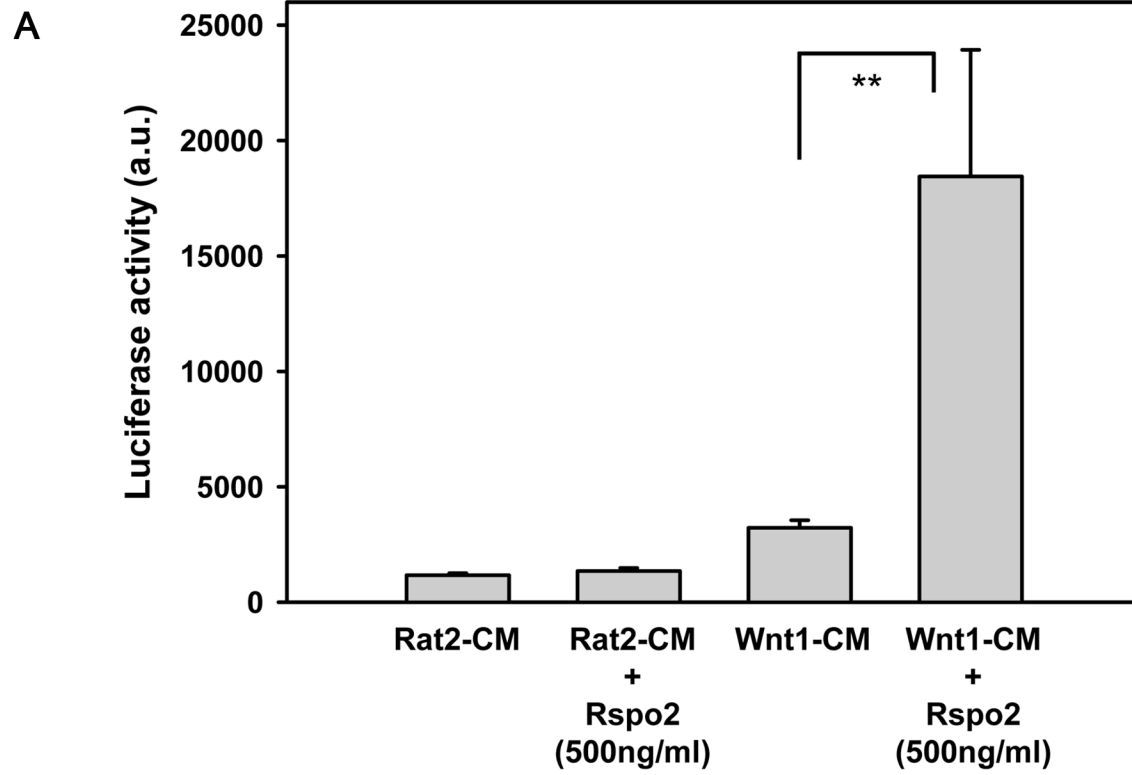

**B**

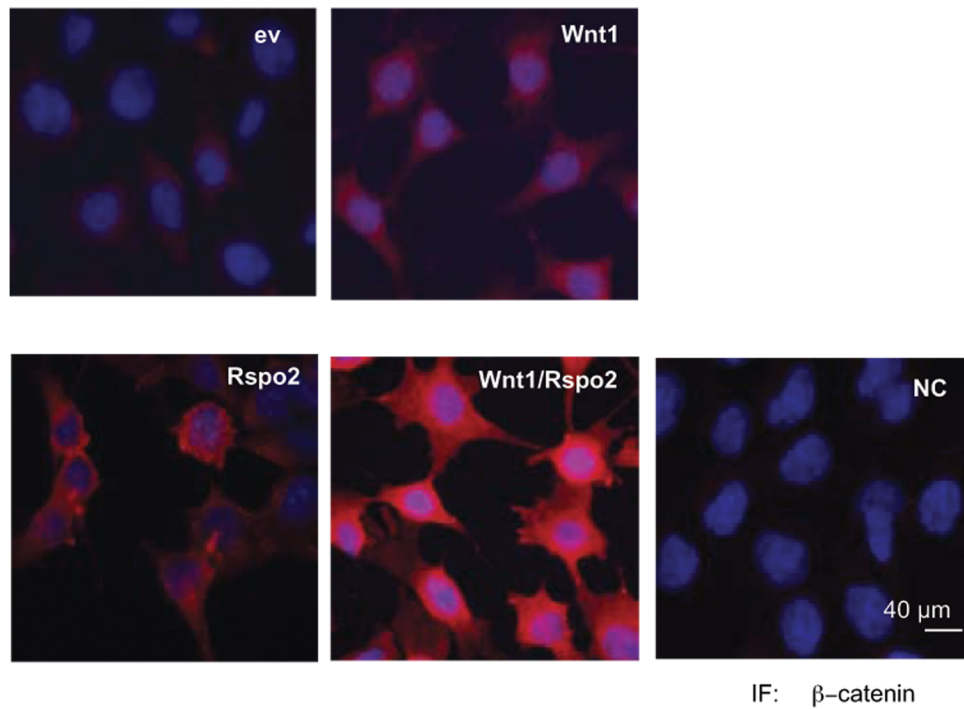

Suppl. Fig. 2

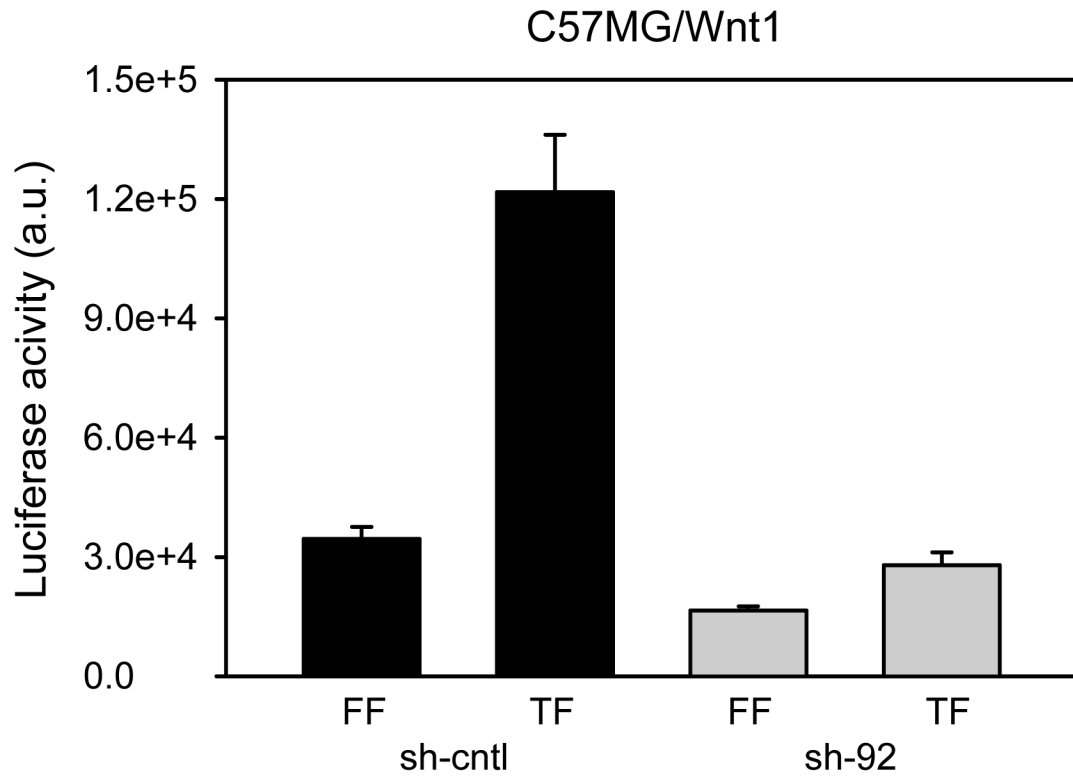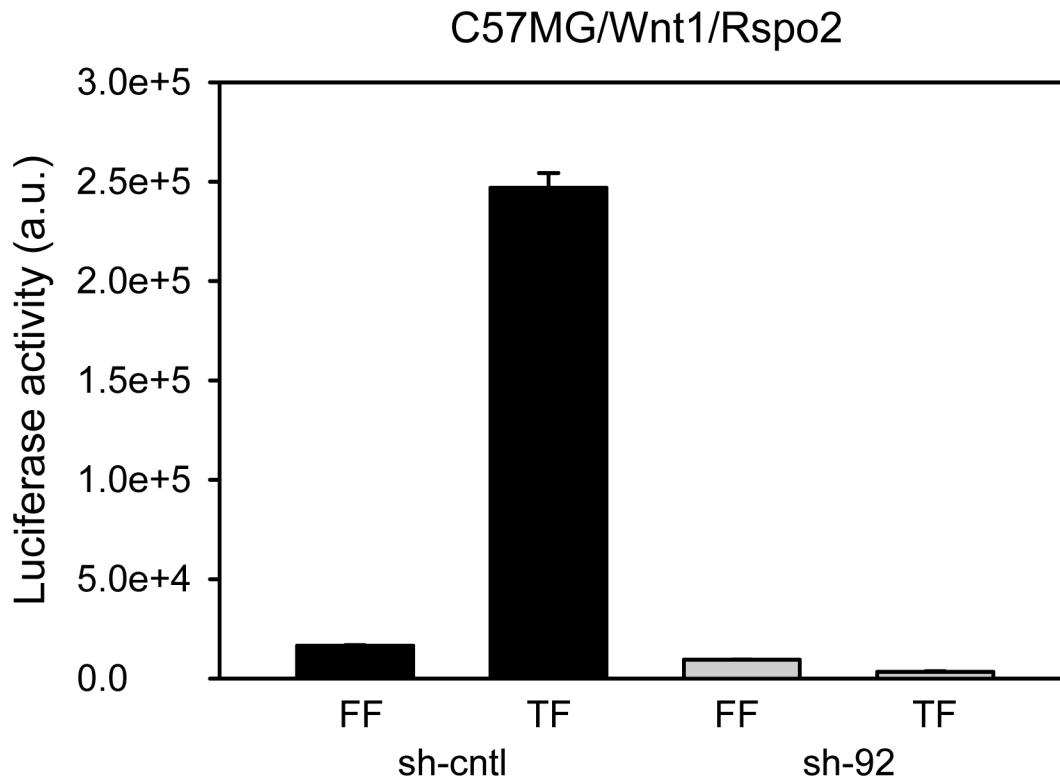

Supplement: NIHMS1064809-supplement-suppl.pdf [file NIHMS1064809-supplement-suppl.pdf]
